# Supplementary material for: Intrachain energy transfer in silylene-spaced alternating donor–acceptor divinylarene copolymers
Source: Royal Society of Chemistry journal article supplement (doi:10.1039/b206308e), 2002-01-01
Supplement: b206308e.doc [file b206308e.doc]

#

Supplementary Material (ESI) for Chemical Communications

This journal is © The Royal Society of Chemistry 2002

#

# **Experimental Section**

**1,4-Bis-{4-[2-(1,3-dithiolanyl)]--styryl}-2,5-dimethoxybenzene (5a)**

A mixture of **10** (1.04 g, 5 mmol) and **9a** (0.97 g, 2.5 mmol), NEt3 (15 mL), Pd(OAc)2 (0.91 g, 0.4 mmol) and (o-tolyl)3P (0.5 g, 0.4 mmol) in DMF (25 mL) was refluxed under N2 for 48 h. After cooled to rt, the mixture was filtered, and the filtrate was poured into methanol. After filtration, the solid was recrystalized (CHCl3/Hexane) to give an orange solid **5a** (1.10 g, 80%): mp 212-214 oC; 1H NMR (CDCl3, 200 MHz):  3.25-3.40 (m, 4 H), 3.4-3.6 (m, 4 H), 3.90 (s, 6 H), 5.64 (s, 2 H), 7.07 (d, *J* = 16.4 Hz, 2 H), 7.10 (s, 2 H), 7.45 (d, *J* = 16.4 Hz, 2 H), 7.74 (s, 8 H); 13C NMR (75 MHz): 40.3, 56.1, 56.3, 109.1, 123.5, 126.5, 126.6, 128.2, 128.3, 139.3, 151.5; IR (KBr)  2919, 2831, 1602, 1493, 1509, 1469, 1415, 1265, 1210, 1084, 966, 968, 852, 756, 525 cm-1; MS m/z (rel intensity): 550 (M+, 100), 489 (21), 475 (12), 430 (11), 124 (11), 191 (13), 60 (48); Anal. Calcd for C30H30O2S4: C, 65.42; H, 5.49; Found: C, 65.83; H, 5.61.

**1,4-Bis-{4-[2-(1,3-dithiolanyl)]--styryl}-2,5-dioctyloxybenzene (5b)**

A mixture of **10** (1.04 g, 5 mmol) and **9b** (1.46 g, 2.5 mmol), NEt3 (15 mL), Pd(OAc)2 (0.91 g, 0.4 mmol) and (o-tolyl)3P (0.5 g, 0.4 mmol) in DMF (25 mL) was treated in the same manner as described above to give **5b** (1.42 g, 80%): mp 154-155 oC; 1H NMR (CDCl3, 400 MHz):  0.84-0.90 (m, 6 H), 1.1-1.5 (m , 20 H), 1.5-1.9 (m , 4 H), 3.30-3.54 (m, 8 H), 4.02 (t , *J* = 6.5 Hz , 4 H), 5.64 (s , 2 H), 7.09 (s, 2 H), 7.09 (d, *J* = 16.4 Hz, 2 H), 7.4-7.6 (m, 10 H); 13C NMR (CDCl3, 100 MHz): 14.2, 22.7, 26.3, 29.3, 29.4, 31.8, 40.3, 56.1, 69.6, 110.7, 123.9, 126.6, 126.9, 128.2, 128.3, 137.9, 139.3, 151.1; IR (KBr)  2927, 2856, 1151, 1493, 1342, 1261, 1205, 965, 853 cm-1; MS m/z ( rel intensity) 746 (M+, 10), 540 (18), 305 (52), 264 (37), 262 (50), 227 (100), 208 (55), 179 (64); Anal. Calcd for C44H58O2S4: C, 70.73; H, 7.82; Found: C, 70.46; H, 7.91.

**1,4-Bis-{4-[-(dimethylsilanyl)vinyl]styryl}-2,5-dimethoxybenzene (3a)** .

A THF solution of Me2(PriO)SiCH2MgCl (100 mmol) prepared from Me2(PriO)SiCH2Cl (18.6 mL, 100 mmol)), and Mg tuning (2.43 g, 100 mmol) was evacuated as much as possible. Under N2, a solution of dithioacetal **5a** (5.45 g, 10 mmol) and NiCl2(PPh3)2 (0.33 g, 0.5 mmol) in benzene (100 mL) was introduced and the mixture was refluxed for 16 h and then poured into 5 % Na2CO3. The organic layer was separated and the aqueous layer was extracted with ether (2 x 50 mL). The combined organic portions were washed with 10% NaOH (2 x 50 mL) and with brine (50 mL), and dried with MgSO4. The solvent was removed in vacuo to afford a gummy mass. This was taken in benzene (100 mL) to which LiAlH4 (1.6 g, 40 mmol) was added and the mixture was refluxed for 18 h. After cooled to rt, the mixture was quenched carefully with water. After filtration, the organic layer was dried and solvent was removed in vacuo to give the residue which was chromatographed on silica gel (hexane) to afford **3a** (2.80 g, 55 % 2 steps): mp 205-206 oC; 1H NMR (300 MHz): 0.23 (d, *J* = 3.8 Hz, 12 H), 3.91 (s, 6 H), 4.15-4.25 (m, 2 H), 6.46 (dd, *J*1 = 19.0 Hz, *J*2 = 2.5 Hz, 2 H), 6.95 (d, *J* = 19.0 Hz, 2 H), 7.09 (d, *J* = 15.9 Hz, 2 H), 7.11 (s, 2 H), 7.41 (d, *J* = 8.2 Hz, 4 H), 7.48 (d, *J* = 15.9 Hz, 2 H), 7.51 (d, *J* = 8.2 Hz, 4 H); 13C NMR (75 MHz): -3.9, 56.3, 109.0, 123.2, 125.9, 126.6, 126.8, 128.5, 137.2, 137.7, 144.9, 151.5; IR (KBr)  2962, 2113, 1600, 1493, 1463, 1413, 1250, 1210, 1183, 1049, 968, 887, 799 cm-1; MS m/z (rel intensity): 510 (M+, 100), 452 (12), 195 (10), 165 (11), 117 (12), 105 (18), 97 (24), 85 (33), 71 (52), 57 (68); Anal. Calcd for C32H38O2S2: C, 75.24; H, 7.50; Found: C, 75.14; H, 7.74.

**1,4-Bis-{4-[-(dimethylsilanyl)vinyl]styryl}-2,5-dioctyloxybenzene (3b)**

In a manner similar to that described above, a mixture of Dithioacetal **5b** (746 mg, 1.0 mmol) and NiCl2(PPh3)2 (33 mg, 0.05 mmol) and Me2(PriO)SiCH2MgCl (10 mmol) was converted to the corresponding isoproxysilane which was reduced with LiAlH4 (0.16 g, 4 mmol) to afford **3b** (430 mg, 61%): mp 157-158 oC; 1H NMR (CDCl3, 300 MHz):  0.24 (d, *J* = 3.7 Hz, 12 H), 0.88 (t, *J* = 6.6 Hz, 12 H), 1.20-1.60 (m, 20 H), 1.86 (quint, *J* = 6.6 Hz, 4 H), 4.04 (t, *J* = 6.4 Hz, 4 H), 4.10-4.30 (m, 2 H), 6.46 (dd, *J* = 19.0 Hz, 2.7 Hz, 2 H), 6.96 (d, *J* = 19.0 Hz, 2 H), 7.10 (d, *J* = 16.4 Hz, 2 H), 7.10 (s, 2 H), 7.30-7.60 (m, 10 H); 13C NMR (CDCl3, 75 MHz):  –4.0, 14.1, 22.3, 26.3, 29.3, 29.4, 29.5, 31.8, 69.6, 110.7, 123.6, 125.8, 126.7, 126.8, 127.0, 128.4, 137.2, 137.9, 145.0, 151.2; IR (KBr)  2958, 2927, 2857, 2113, 1599, 1511, 1206, 887, 798 cm –1; MS m/z (rel intensity): 706 (M+, 16), 368 (41), 353 (15), 199 (23), 87 (16), 78 (51), 60 (100); HRMS Calcd: 706.4601; Found: 706.4604; Anal. Calcd for C46H66O2Si2: C, 78.13; H, 9.41; Found: C, 78.18, H, 9.31.

**2,5-Bis{2-[dimethyl(-styryl)silanyl]vinyl]-1,4-dimyrtoxybenzene (4c)**

Under N2 a mixture of **8** (320 mg, 2.3 mmol) and **15** (446 mg, 1 mmol) and RhCl(PPh3)3 (1.5 mg) in CH2Cl2 (1.5 mL) wasstirred at rt for 12h. The mixture was evaporated in vacuo and the residue was chromatographed on silica gel (3 EA/hexane) to afforded **4c** (380 mg, 50): mp 103-104 C; 1H NMR (CDCl3, 200MHz):  0.30 (s, 12 H), 0.83 (s, 6 H), 1.19 (s, 6 H), 1.30-1.48 (m. 2 H), 1.48-1.80 (m, 8 H), 1.80-1.93 (m, 2 H), 1.95-2.15 (m, 2 H), 2.3-2.6 (m, 2 H), 3.74 (d, *J* = 6.8 Hz, 4 H), 6.44 (d, *J*  19.2 Hz, 2 H), 6.51 (d, *J*  19.1 Hz, 2 H), 6.94 (d, *J*  19.1 Hz, 2 H); 13C NMR (CDCl3, 75 MHz):  18.5, 20.2, 23.7, 14.1, 16.7, 35.3, 39.3, 40.9, 42.9, 73.4, 110.3, 126.4, 127.4, 128.0, 128.1, 128.5, 138.3, 139.1, 144.8, 151.0; IR (KBr)  2930, 2867, 1598, 1575, 1487, 1462, 1424, 1383, 1248, 1222, 1194, 991, 843, 786 cm–1; MS m/z (rel intensity): 754 (M+, 70), 594(21), 457 (6), 377 (8), 329 (8), 261 (12), 218 (9), 161 (20), 137 (16), 95 (23), 81 (100), 69 (30); Anal. Calcd for C50H66O2Si2: C, 79.52; H, 8.81; Found: C, 79.52; H, 8.24.

**2,5-{4,4’-Bis-{2-[dimethyl(-styryl)silanyl]vinyl}phenyl}[1,3,4]oxadiazole (4a)**

In a manner similar to that described above, a mixture of **8** (567 mg, 3.5 mmol), **7a** (405 mg, 1.5 mmol) and RhCl(PPh3)3 ( 1.5 mg, 0.5 mol %) in CH2Cl2 (1.5 mL) was converted to **4a** (607 mg, 63%): mp 154-155 oC; 1H NMR (CDCl3, 400 MHz):  0.33 (s, 12 H), 6.51 (d, *J* = 19.2 Hz, 2 H), 6.68 (d, *J* = 19.1 Hz, 2 H), 6.96 (d, *J* = 19.2 Hz, 2 H), 6.99 (d, *J* = 19.1 Hz, 2 H), 7.23-7.28 (m, 2 H), 7.33 (t, *J* = 8.1 Hz, 4 H), 7.46 (d, *J* = 8.1 Hz, 4 H), 7.59 (d, *J* = 8.4 Hz, 4 H), 8.10 (d, *J* = 8.4 Hz, 4 H); 13C NMR (CDCl3, 100 MHz):  –2.6, 123.2, 126.5, 126.8, 127.1, 127.2, 128.2, 128.6, 130.9, 138.1, 141.4, 143.6, 145.3, 164.4; MS m/z (rel intensity): 594 (M+, 69), 503 (16), 436 (42), 231 (65), 173 (100), 145 (92); Anal. Calcd for C38H38N2OSi2:: C, 76.72; H, 6.44; N, 4.71; Found C, 76.41; H, 6.62; N, 4.74.

**2,5-diiodo-1,4-dimyrtoxybenzene (13).**

To a solution of **12** (9.20 g, 25.4 mmol) and **11** (16.5 g, 53.5 mmol) in DMSO (175 mL), was added KOH (4.5 g, 80.2 mmol). The mixture was stirred at rt for 36 h, poured into water, and extracted twice with ether. The combined organic extracts were washed with 10% NaOH, water, and brine successively, dried with MgSO4, then filtered. The solvent was removed in vacuo and the residue was recrystallized from CHCl3/CH3OH to afford **13** (9.5 g , 59%) : mp 109 – 110 oC; []26.8 = -3.95 (c 0.1 g/mL, CHCl3); 1H NMR (300 MHz): 0.87 (s, 6 H), 1.22 (s, 6 H), 1.30 –1.50 (m, 4 H), 1.70 – 1.95 (m, 8 H), 1.96 - 2.10 (m, 4 H), 2.48 (quint, *J* = 7.76, 2 H), 3.65 - 3.74 (m, 4 H), 7.13 (s, 2 H); 13C NMR (75 MHz):  18.5, 20.2, 23.7, 24.1, 26.7, 35.0, 39.3, 40.9, 42.7, 74.5, 86.2, 122.8, 153.0; IR (KBr) 2952, 2913, 2870, 1486, 1453, 1354, 1210, 1057, 1016 cm-1; MS m/z (rel intensity): 634 (M+, 80), 498 (21), 362 (81), 236 (9), 137 (47), 121 (9), 95 (36), 81 (100), 69 (65), 55(16); Anal. Calcd for C26H36I2O2: C, 49.23; H, 5.72; found C, 49.09; H, 5.61.

**2,5-Bis-(trimethylsilylethynyl)-1,4-dimyrtoxy-benzene (14)**

To a stirred mixture of **13** (5.02 g, 7.9 mmol), CuI (0.12 g, 0.64 mmol) and Pd(PPh3)2Cl2 (0.28 g, 0.40 mmol) in THF (15 mL), was sequentially added Et3N (3.5 mL, 24.4 mmol) and trimethylsilylacetylene (2.61 mL, 17.4 mmol) in THF (5 mL). The mixture was stirred at rt for 4 h. The solid was filtrated through silica gel and the filtrate was evaporated in vacuo to give **14** (4.2 g, 92%): mp 181-182 oC (CHCl3/CH3OH); []D = -13.3 ( c = 0.05 g/mL, CHCl3); 1H NMR (300 MHz): 0.23 (s, 18 H), 0.86 (s, 6 H), 1.21 (s, 6 H), 1.35 – 1.45 (m, 4 H), 1.65 – 1.80 (m, 5 H), 1.95 – 2.05 (m, 2 H), 2.48 (quint, *J* = 7.38 Hz, 2 H), 3.65-3.75 (m, 4 H), 6.85 (s, 2 H); 13C NMR (75 MHz): 0.0, 18.1, 20.2, 23.6, 24.1, 26.7, 35.1, 39.3, 40.9, 42.6, 73.0, 100.0, 101.1, 113.8, 116.8, 154.1; IR (KBr)  2930, 2873, 2159, 1498, 1462, 1408, 1384, 1251, 1225, 1031, 893, 845, 761 cm-1; MS m/z (rel intensity): 574 (M+, 76), 438 (13), 302 (100), 287 (64), 262 (12), 95 (24), 81 (58), 69 (33), 57 (27); Anal. Calcd for C36H54O2Si2: C, 75.20; H, 9.47; found C, 75.56; H, 9.32.

**2,5-Diethynyl-1,4-dimyrtoxybenzene (15)** 

To a stirred solution of **14** (3.38 g, 5.9 mmol) in THF (100 mL), were added methanol (50 mL) and 20% aqueous KOH solution (3.5 mL) at room temperature. The mixture was stirred at rt for 2 h, then filtered. The solvent was removed in vacuo to give the residue which was chromatographed on silica gel (0.5% ethyl acetate/hexane) to afford **15** (2.0 g, 79%): mp 103–105 oC (CHCl3/CH3OH); []26.7 = -8.05 (c = 0.172 g/mL, CHCl3); 1H NMR (300 MHz): 0.85 (s, 6 H), 1.20 (s, 6 H), 1.30 – 1.50 (m, 4 H), 1.60 – 1.90 (m, 8 H), 1.90 – 2.00 (m, 2 H), 2.00 – 2.15 (m 2H), 2.47 (quint, *J* = 7.62 Hz, 2 H), 3.30 (s, 2 H), 3.66-3.76 (m, 4 H), 6.91 (s, 2 H); 13C NMR (75 MHz): 18.4, 20.2, 23.7, 24.1, 26.7, 34.8, 39.3, 40.9, 42.6, 73.7, 79.8, 82.4, 113.3, 117.8, 154.2; IR (KBr)  3293, 2934, 2916, 2871, 1501, 1462, 1388, 1277, 1225, 1028, 863, 64 6 cm-1; MS m/z (rel intensity): 430 (M+, 49), 294 (12), 158 (100), 136 (19), 95 (19), 81 (58), 69 (29), 55 (10); Anal. Calcd for C30H38O2: C, 83.68; H, 8.89; found C, 83.68; H, 8.77.

**4,4’-Bis-[2-(1,3-dithiolanyl)]stilbene (5c)**

To a solution of **16** (4.16 g, 20 mmol) and **10** (5.52 g, 20 mmol) in DMF (100 mL) and NEt3 (60 mL), was added Pd(OAc)2 (0.36 g, 1.6 mmol) and (o-tolyl)3P (1.96 g, 6.4 mmol), and the mixture was refluxed under N2 for 36 h. After cooled to rt, the mixture was filtered, and the filtrate was poured into methanol to give **5c** (6.92 g, 58%): mp 211-213 C (CHCl3/Hexane); IR (KBr) 3022, 2969, 2918, 1599, 1415, 1365, 1228, 1174, 964, 840, 765, 691 cm-1; 1H NMR (CDCl3 , 300 MHz):  3.32-3.41 (m, 4 H), 3.43-3.52 (m, 4 H), 5.63 (s, 2 H), 7.05 (s, 2 H), 7.42 (d, *J* = 8.6 Hz, 4 H), 7.49 (d, *J* = 8.2 Hz, 4 H); 13C NMR (50 MHz): 40.3, 56.0, 126.6, 128.3, 128.4, 137.1, 139.7;m/z (rel intensity): 388 (M+, 18), 360 (4), 305 (38), 289 (18), 262 (14), 208 (24), 180 (16), 165 (10), 153 (41), 84 (100), 69 (16), 47 (18); HRMS Calcd for C20H20S4: 388.0447; Found: 388.0451; Anal. Calcd: C, 61.81; H, 5.91; Found. C, 61.65; H, 5.02.

**4,4’-Bis-[2-(dimethylsilanyl)vinyl]stilbene (3c)**

**4,4’-Bis-[2-(dimethylsilanyl)vinyl)]stilbene** **(3c)**

In a manner similar to that described for the preparation of **3a.** Dithioacetal **5c** (746 mg, 1.0 mmol) was converted to **3c** (430mg, 61 %): mp 166-167 C; IR (KBr) 3056, 2984, 2954, 2900, 2106, 1509, 1416, 1365, 1249, 1217, 999, 885, 803, 742, 630, 536 cm-1; 1H NMR (CDCl3, 300 MHz):  0.24 (d, 3.6 Hz, 12 H), 4.17-4.28 (m, 2 H), 6.47 (dd, *J* = 19.1 Hz, *J* = 2.5 Hz, 2 H), 6.96 (d, *J* = 19.1 Hz, 2 H), 7.09 (s, 2 H), 7.42 (d, *J* = 8.4 Hz, 4 H), 7.47 (d, *J* = 8.4 Hz, 4 H); 13C NMR (CDCl3, 75 MHz): -4.0, 126.1, 126.7, 126.8, 128.3, 137.1, 137.4, 144.8; MS m/z (rel intensity): 348 (M+, 100), 333 (16), 290 (18), 275 (17), 202 (10), 171 (30), 145 (14), 105 (4), 73 (6), 59 (18); HRMS Calcd for C22H28Si2: 348.1729; Found: 348.1726; Anal. Calcd: C, 75.82; H, 8.10; Found: C, 75.57; H, 8.16.

**2,5-Bis-[4-(trimethylsilylethynyl)phenyl] [1,3,4]oxadiazole (18)**

To a mixture of trimethylsilylacetylene (4.5 mL, 30.0 mmol) and **17** (3.8 g, 10.0 mmol) in NEt3 (50 mL), were added Pd(PPh3)2Cl2 (0.35 g, 0.5 mmol) and copper(I) iodide (95 mg, 0.5 mmol). The mixture was refluxed under N2 for 8 h and then cooled to rt, filtered and the filtrate was evaporated in vacuo to give the residue which was chromatographed on silica gel. (5% EA/hexane) to give a white solid **18** (2.39 g, 71 %): mp 241-242 oC; IR (KBr) 2157, 1486, 1258, 1249, 844, 758, 688 cm -1; 1H NMR (CDCl3, 200 MHz):  0.25 (s, 18 H), 7.59 (d, *J* = 8.4 Hz, 4 H), 8.06 (d, *J* = 8.4 Hz, 4 H); 13C NMR (CDCl3, 75 MHz):  -0.18, 97.9, 103.9, 123.3, 126.69, 126.74, 132.6, 164.2; MS m/z (rel intensity): 414 (M+, 9), 399 (10), 184 (16), 85 (75), 83 (100), 57 (26); HRMS calcd for C24H26N2OSi2: 414.1584; Found: 414.1588; Anal. Calcd: C, 69.52; H, 6.32; N, 6.76; Found: C, 69.49; H, 6.25; N, 6.47.

**2,5-Bis-(4-ethynylphenyl) [1,3,4]oxadiazole (7a)**

A mixture of **18** (0.414 g, 1 mmol) and K2CO3 (25 mg, 0.18 mmol) in MeOH (10mL) was stirred at rt for 4 h. After filtration, the solvent was evaporated in vacuo to give the residue which was chromatographed on silica gel (5% EA/hexane) to give a yellowish solid **7a** (0.23 g, 85 %): mp 196-198 oC; IR (KBr) 3285, 1486, 747, 653, 620, 538 cm-1; 1H NMR (CDCl3, 200 MHz):  3.24 (s, 2 H), 7.63 (d, *J* = 8.4 Hz , 4 H ) , 8.08 (d, *J* = 8.4 Hz, 4 H ); 13C NMR (CDCl3, 75 MHz):  80.2, 80.6, 123.7, 125.7, 126.7, 132.7, 164.1; MS m/z (rel intensity): 270 (M+, 100), 213 (38), 149 (15), 129 (54), 109 (29), 95 (39), 81 (37), 69 (44), 57 (52); HRMS Calcd for C18H10N2O: 270.0793; Found: 270.0795; Anal. Calcd: C, 79.99; H, 3.73; N, 10.36; Found. C, 80.29; H, 3.73; N, 9.96.

**Polymer (1b)**

To a solution of **7a** (0.172 g, 0.25 mmol) and **3b** (0.066 g, 0.25 mmol) in THF (5 mL) was added Rh(PPh3)3Cl (2.3 mg, 0.5mol%) under N2. The mixture was refluxed at room for 10 h, poured into CH3OH. The precipitate was collected and re-dissolved in THF, then precipitated again with CH3OH. The product was collected by filtration and washed with CH3OH (0.15 g, 64%): Mn = 4100, PDI = 1.5; 1H NMR (CDCl3, 200 MHz): 0.34 (br. s, 12 H), 0.7-1.0 (m, 6 H), 1.0-1.6 (m, 18 H), 1.7-2.0 (m, 6 H), 3.9-4.2 (m, 4 H), 6.4-7.2 (m, 12 H), 7.3-7.7 (m, 12 H), 7.8-8.2 (m, 6 H); IR (KBr)  2952, 2916, 2870, 1599, 1494, 1467, 1412, 1250, 1212, 1048, 990, 843; Anal. Calcd for C64H76N2O3Si2: C, 78.64; H, 7.84; N, 2.87; Found: C, 77.34; H, 7.75; N, 2.68.

**Polymer (1c)**

In a manner similar to that described above, a mixture of **7b** (63 mg, 0.5 mmol), **3c** (167.5 mg, 0.5 mmol) and Rh(PPh3)3Cl (4.6 mg, 0.1 M) was converted to **1c** (193 mg, 84%): Mn = 3200, PDI = 2.7;IR (KBr) 2900, 2843, 2351, 1677, 1652, 1590, 1465, 1442, 1200, 1043, 969; 1H NMR (CDCl3, 200 MHz):  0.31 (br. s, 12 H), 6.3-6.7 (m, 4 H), 6.8-7.2 (m, 6 H), 7.3-7.7 (m, 12 H); Anal. Calcd for C32H34Si2: C, 80.95; H, 7.22; Found: C, 79.98; H, 7.75.

**Polymer (1d)**

In a manner similar to that described above, a mixture of **3a** (102 mg, 0.2 mmol) and **7c** (89.3 mg, 0.2 mmol) and Rh(PPh3)3Cl (2.3 mg, 0.1 M) was converted to **1d** (168 mg, 87%): Mn = 3990, PDI = 1.5; IR (KBr)2921, 2869, 2351, 1670, 1660, 1600, 1499, 1463, 1421, 1208, 1025, 969, 757; 1H NMR (CDCl3, 200 MHz):  0.3 (br. s, 12 H), 0.83 (br. s, 6 H), 1.19 (br. s, 6 H), 1.3-2.3 (m,14 H), 2.3-2.6 (m, 2 H), 3.4-3.8 (m, 4 H), 3.85-4.2 (m, 6 H), 6.3-6.7 (m, 3 H), 6.75-7.2 (m, 10 H), 7.3-7.7 (m, 11 H). Anal. Calcd for C62H76O4Si2: C, 79.10; H, 8.14; Found: C, 80.12; H, 9.06.
